# Supplementary material for: Over-expression of BAG-1 in head and neck squamous cell carcinomas (HNSCC) is associated with cisplatin-resistance
Source: Springer Nature journal article supplement (doi:10.1186/s12967-017-1289-2), 2017-09-06
Supplement: MOESM2 [file 15018466]

# Additional file 2: Figure S1

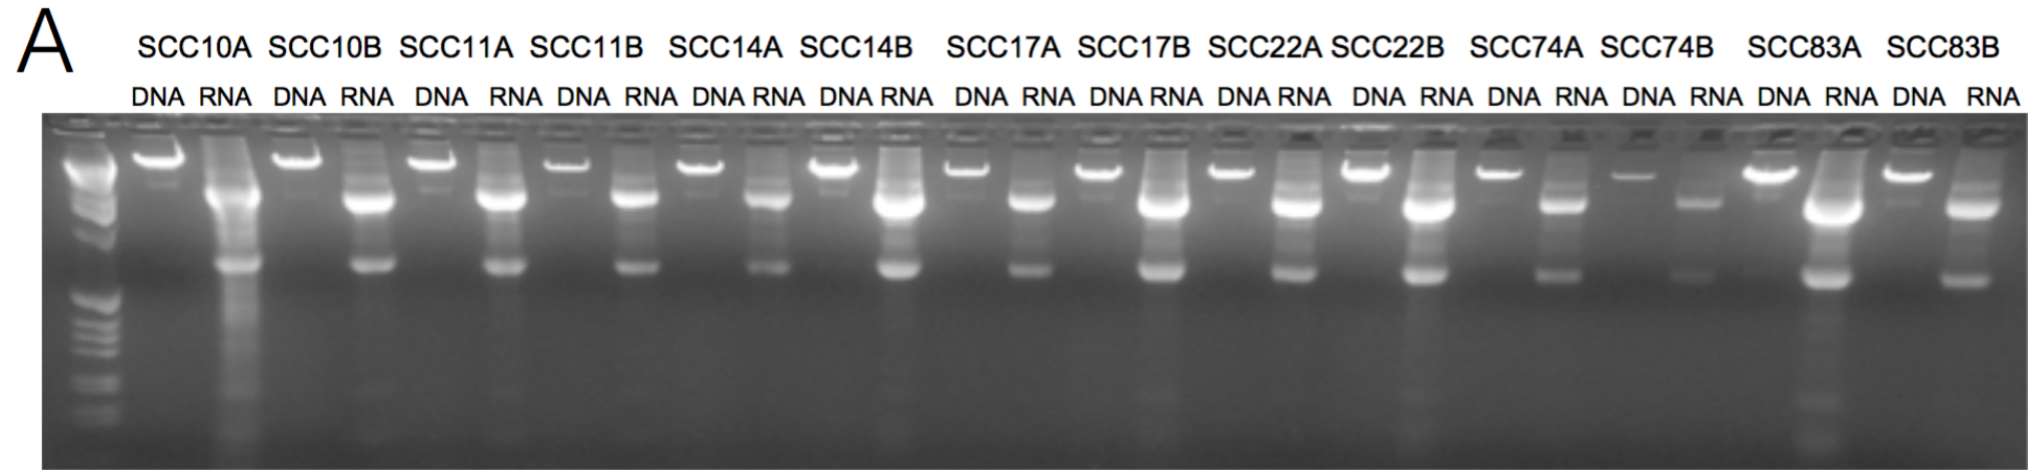

**B**

## Top Diseases and Bio Functions

### ▼ Diseases and Disorders

| Name                                |  | p-value range       | # Molecules |
|-------------------------------------|--|---------------------|-------------|
| Cancer                              |  | 2.47E-02 - 2.79E-05 | 146         |
| Hematological Disease               |  | 2.47E-02 - 2.79E-05 | 91          |
| Immunological Disease               |  | 2.47E-02 - 2.79E-05 | 89          |
| Organismal Injury and Abnormalities |  | 2.47E-02 - 2.79E-05 | 193         |
| Inflammatory Disease                |  | 2.47E-02 - 2.87E-04 | 18          |

1 2 3 4 5 6 7 8 9 >

### ▼ Molecular and Cellular Functions

| Name                                   |  | p-value range       | # Molecules |
|----------------------------------------|--|---------------------|-------------|
| Cell Death and Survival                |  | 2.47E-02 - 6.07E-04 | 6           |
| Cell-To-Cell Signaling and Interaction |  | 2.47E-02 - 6.07E-04 | 10          |
| Cellular Compromise                    |  | 2.47E-02 - 6.07E-04 | 9           |
| Small Molecule Biochemistry            |  | 2.47E-02 - 6.07E-04 | 17          |
| Cell Morphology                        |  | 2.47E-02 - 3.06E-03 | 15          |

1 2 3 4 5 6 7 8 9 >
